# Supplementary material
Source: publisher figshare collection journal article supplement (https://diabetesjournals.figshare.com/ndownloader/files/33953099)
Supplement: Supplementary file 1 [file 33953099]

## SUPPLEMENTARY MATERIAL

### **Plasma industrial and ruminant *trans* fatty acids and incident type 2 diabetes in the EPIC-Potsdam cohort**

Marcela Prada, MSc<sup>1,2</sup>; Clemens Wittenbecher, PhD<sup>1,2,3</sup>; Fabian Eichelmann, PhD<sup>1,2</sup>; Andreas Wernitz, Dipl.-Chem.<sup>1,2</sup>; Olga Kuxhaus, MSc<sup>1,2</sup>; Janine Kröger, DrPH<sup>1,2</sup>; Cornelia Weikert, MD, MPH<sup>4</sup>; Matthias B. Schulze, DrPH<sup>1,2,5</sup>

<sup>1</sup> Department of Molecular Epidemiology, German Institute of Human Nutrition Potsdam-Rehbrücke, Nuthetal, Germany

<sup>2</sup> German Center for Diabetes Research (DZD), München-Neuherberg, Germany

<sup>3</sup> Department of Nutrition, Harvard T.H. Chan School of Public Health, Boston, MA

<sup>4</sup> German Federal Institute for Risk Assessment, Department of Food Safety, Berlin, Germany

<sup>5</sup> Institute of Nutritional Science, University of Potsdam, Nuthetal, Germany

**Supplementary Table 1. Dairy food groups**

| Dairy groups   | Foods included                                                                                                                                                                                                                                                     |
|----------------|--------------------------------------------------------------------------------------------------------------------------------------------------------------------------------------------------------------------------------------------------------------------|
| Low-fat dairy  | low-fat milk and milk beverages ( $\leq 1.5\%$ fat), low-fat yogurt ( $\leq 1.5\%$ fat), kefir ( $\leq 1.5\%$ fat), curd cheese ( $\leq 5\%$ fat), and low-fat cheese (reduced fat or lean: cream cheese, gouda, emmental, tilsiter, camembert, brie, gorgonzola). |
| Full-fat dairy | full-fat milk and milk beverages ( $> 1.5\%$ fat), full-fat yogurt ( $> 1.5\%$ fat), curd cheese ( $> 5\%$ fat), heavy cream, and full-fat cheese (full-fat cream cheese, gouda, emmental, tilsiter, camembert, brie, gorgonzola, processed cheese).               |

**Supplementary Table 2. Trans fatty acids profile**

| Class                        | Lipid name                  | Common name                    | Systematic Name                              |
|------------------------------|-----------------------------|--------------------------------|----------------------------------------------|
| Ruminant Trans Fatty Acids   | 16:1n-7 <i>t</i>            | <i>trans</i> -palmitoleic acid | <a href="#">9E-hexadecenoic acid</a>         |
|                              | 18:1n-7 <i>t</i>            | <i>trans</i> -vaccenic acid    | <a href="#">11E-octadecenoic acid</a>        |
|                              | <i>c</i> 9 <i>t</i> 11-CLA  | Rumenic acid                   | <a href="#">9Z,11E-octadecadienoic acid</a>  |
|                              | <i>t</i> 10 <i>c</i> 12-CLA | 10E,12Z-octadecadienoic acid   | <a href="#">10E,12Z-octadecadienoic acid</a> |
| Industrial Trans Fatty Acids | 18:1n-9 <i>t</i>            | 9-elaidic acid                 | <a href="#">9E-octadecenoic acid</a>         |
|                              | 18:1n-6 <i>t</i>            | <i>trans</i> -12-elaidic acid  | <a href="#">12E-octadecenoic acid</a>        |
|                              | 18:2n-6,9 <i>t</i>          | Linoelaidic acid               | <a href="#">9E,12E-octadecadienoic acid</a>  |

**Supplementary Table 3. Comparison between full cohort with blood samples and random subcohort before exclusions**

| Characteristics                      | Full cohort      | Subcohort before exclusions | Subcohort after exclusions |
|--------------------------------------|------------------|-----------------------------|----------------------------|
| N                                    | 26437*           | 1248                        | 1159                       |
| Sex (% women)                        | 59.8             | 60.1                        | 60.8                       |
| Age (median, IQR)                    | 50.7 (42.6-58.4) | 50.7 (42.4-58.0)            | 49.4 (42.1-57.7)           |
| BMI (median, IQR)                    | 25.7 (23.2-28.6) | 25.6 (23.2-28.2)            | 25.4 (23.0-28.0)           |
| Education (%)                        |                  |                             |                            |
| Currently in training/no certificate | 3.5              | 3.8                         | 3.5                        |
| Skilled worker                       | 35.0             | 34.6                        | 35.1                       |
| Professional school                  | 24.8             | 24.0                        | 23.8                       |
| High education/university            | 36.7             | 37.5                        | 37.5                       |
| Smoking status (%)                   |                  |                             |                            |
| Never smoker                         | 46.8             | 47.5                        | 48.5                       |
| Ex-smoker                            | 32.5             | 31.6                        | 31.4                       |
| Smoker <20 units/day                 | 14.8             | 15.3                        | 14.8                       |
| Smoker ≥20 units/day                 | 5.8              | 5.6                         | 5.3                        |

\*There were missing values for BMI (n=198), education (n=17), smoking (n=16)

**Supplementary Table 4. Baseline characteristics according to quintiles of total dairy trans fatty acids (sum of 16:1n-7t, 18:1n-7t, c9t11-CLA and t10c12-CLA), EPIC-Potsdam subcohort (n=1159)**

|                                            | Fifths of plasma phospholipid total dairy trans-fatty acid concentration |                         |                         |                         |                         | Total                   |
|--------------------------------------------|--------------------------------------------------------------------------|-------------------------|-------------------------|-------------------------|-------------------------|-------------------------|
|                                            | First                                                                    | Second                  | Third                   | Fourth                  | Fifth                   |                         |
| <b>Ruminant trans fatty acids (%) *, †</b> | <b>0.37 (0.34-0.39)</b>                                                  | <b>0.44 (0.43-0.46)</b> | <b>0.50 (0.49-0.52)</b> | <b>0.58 (0.56-0.60)</b> | <b>0.71 (0.66-0.78)</b> | <b>0.50 (0.43-0.60)</b> |
| 16:1n-7t (%) †                             | 0.03 (0.02-0.03)                                                         | 0.04 (0.03-0.04)        | 0.04 (0.03-0.04)        | 0.04 (0.04-0.05)        | 0.05 (0.04-0.06)        | 0.04 (0.03-0.05)        |
| 18:1n-7t (%) †                             | 0.13 (0.11-0.15)                                                         | 0.17 (0.15-0.18)        | 0.19 (0.17-0.21)        | 0.23 (0.20-0.26)        | 0.28 (0.25-0.32)        | 0.19 (0.15-0.24)        |
| c9t11-CLA (%) †                            | 0.20 (0.17-0.22)                                                         | 0.23 (0.22-0.25)        | 0.27 (0.24-0.29)        | 0.30 (0.27-0.33)        | 0.37 (0.32-0.43)        | 0.26 (0.22-0.31)        |
| t10c12-CLA (%) †                           | 0.01 (0.01-0.01)                                                         | 0.01 (0.01-0.01)        | 0.01 (0.01-0.01)        | 0.01 (0.01-0.01)        | 0.01 (0.01-0.01)        | 0.01 (0.01-0.01)        |
| Industrial TFA                             |                                                                          |                         |                         |                         |                         |                         |
| 18:1n-6t (%) †                             | 0.08 (0.06-0.09)                                                         | 0.09 (0.08-0.11)        | 0.10 (0.08-0.11)        | 0.11 (0.09-0.13)        | 0.11 (0.09-0.16)        | 0.09 (0.08-0.12)        |
| 18:1n-9t (%) †                             | 0.14 (0.12-0.16)                                                         | 0.16 (0.14-0.19)        | 0.16 (0.14-0.19)        | 0.18 (0.14-0.23)        | 0.19 (0.14-0.27)        | 0.16 (0.13-0.20)        |
| 18:2n-6,9t (%) †                           | 0.02 (0.02-0.02)                                                         | 0.02 (0.02-0.03)        | 0.02 (0.02-0.03)        | 0.02 (0.02-0.03)        | 0.02 (0.02-0.03)        | 0.02 (0.02-0.03)        |
| Age (years) †                              | 48.8 (42.2-56.2)                                                         | 49.5 (41.7-57.4)        | 52.7 (42.3-58.5)        | 46.7 (41.4-57.5)        | 50.9 (43.0-58.5)        | 49.4 (42.1-57.7)        |
| Sex (% women)                              | 42.7                                                                     | 56.0                    | 64.5                    | 69.4                    | 71.6                    | 60.8                    |
| Body mass index (kg/m <sup>2</sup> ) †     | 26.4 (24.0-29.5)                                                         | 26.0 (23.3-29.3)        | 25.2 (23.3-28.1)        | 24.5 (22.2-27.4)        | 24.5 (22.4-26.8)        | 25.4 (23.0-28.0)        |
| Waist (cm) †                               | 89.3 (82.0-97.0)                                                         | 87.0 (76.0-96.0)        | 83.0 (75.2-93.0)        | 80.8 (73.0-90.3)        | 80.5 (72.0-90.0)        | 85.0 (75.0-93.8)        |
| Leisure time physical activity (h/week) †  | 0 (0-2)                                                                  | 0 (0-1)                 | 0 (0-1)                 | 0 (0-1.5)               | 0 (0-1.8)               | 0 (0-1.5)               |
| Alcohol from alcoholic drinks (g/day) †    | 15.6 (3.4-29.3)                                                          | 8.6 (3.1-19.3)          | 7.9 (2.9-16.3)          | 6.8 (2.4-18.8)          | 6.1 (2.0-14.9)          | 8.4 (2.9-20.1)          |
| Type of work. (%)                          |                                                                          |                         |                         |                         |                         |                         |
| (Heavy) manual work                        | 6.9                                                                      | 7.3                     | 4.3                     | 6.5                     | 4.7                     | 6.0                     |
| Sedentary occupation                       | 52.6                                                                     | 59.9                    | 61.0                    | 63.4                    | 60.3                    | 59.4                    |
| Standing occupation                        | 40.5                                                                     | 32.8                    | 34.6                    | 30.2                    | 34.9                    | 34.6                    |
| Hypertension (%)                           | 35.3                                                                     | 33.2                    | 36.4                    | 28.9                    | 33.2                    | 33.4                    |
| Education (%)                              |                                                                          |                         |                         |                         |                         |                         |
| High education/university                  | 34.5                                                                     | 36.6                    | 41.6                    | 37.9                    | 37.1                    | 37.5                    |
| Currently in training/no certificate       | 5.2                                                                      | 1.3                     | 4.3                     | 3.0                     | 3.9                     | 3.5                     |
| Professional school                        | 19.1                                                                     | 25.4                    | 19.0                    | 28.0                    | 27.6                    | 23.8                    |
| Skilled worker                             | 41.4                                                                     | 36.6                    | 35.1                    | 31.0                    | 31.5                    | 35.1                    |

|                               |                  |                  |                  |                  |                  |                  |
|-------------------------------|------------------|------------------|------------------|------------------|------------------|------------------|
| Smoking status (%)            |                  |                  |                  |                  |                  |                  |
| Never smoker                  | 35.8             | 43.1             | 54.5             | 51.3             | 57.8             | 48.5             |
| Ex-smoker                     | 37.9             | 36.2             | 29.0             | 28.0             | 25.9             | 31.4             |
| Smoker < 20 units/day         | 18.1             | 15.5             | 12.6             | 15.9             | 12.1             | 14.8             |
| Smoker ≥ 20 units/day         | 8.2              | 5.2              | 3.9              | 4.7              | 4.3              | 5.3              |
| HbA <sub>1c</sub> (%) †       | 5.4 (5.2-5.8)    | 5.4 (5.1-5.8)    | 5.4 (5.2-5.8)    | 5.3 (5.1-5.6)    | 5.4 (5.1-5.6)    | 5.4 (5.1-5.7)    |
| Triglycerides (mg/dL) †       | 126 (82-184)     | 108 (74-170)     | 102 (77-148)     | 94 (70-136)      | 99 (72-143)      | 106 (74-161)     |
| Non-HDL cholesterol (mg/dL) † | 154 (124-178)    | 149 (123-180)    | 146 (122-172)    | 145 (118-166)    | 141 (115-173)    | 147 (119-173)    |
| HDL cholesterol (mg/dL) †     | 52 (45-63)       | 55 (46-63)       | 55 (47-64)       | 57 (48-67)       | 57 (47-66)       | 55 (46-65)       |
| Adiponectin (µg/ml) †         | 6.7 (4.8-9.1)    | 7.3 (5.6-9.8)    | 8.3 (5.5-11.6)   | 8.5 (6.2-11.9)   | 8.4 (6.0-11.6)   | 7.8 (5.5-10.8)   |
| Fetuin (µg/ml) †              | 257 (224-299)    | 268 (222-302)    | 265 (224-312)    | 271 (230-316)    | 270 (233-312)    | 265 (227-308)    |
| hsCRP (mg/dL) †               | 0.07 (0.02-0.27) | 0.10 (0.04-0.25) | 0.06 (0.02-0.18) | 0.07 (0.02-0.15) | 0.07 (0.02-0.16) | 0.07 (0.02-0.20) |
| GGT (units/L) †               | 25 (14-45)       | 19 (12-35)       | 16 (10-28)       | 14 (10-27)       | 15 (10-27)       | 17 (12-32)       |

\* Ruminant trans fatty acids are the sum of the relative concentrations of the fatty acids 16:1n-7*t*, 18:1n-7*t*, *c*9*t*11-CLA, *t*10*c*12-CLA

† Values are presented as median (interquartile range)

HbA<sub>1c</sub>, hemoglobin A<sub>1c</sub>; hsCRP, high-sensitivity C-reactive protein; GGT, γ-glutamyl transferase

**Supplementary Table 5. Pearson correlation coefficients between specific plasma phospholipid trans fatty acids adjusted for age and sex, EPIC-Potsdam subcohort (n=1159)**

|  |            | Ruminant TFA |          |           |            | Industrial TFA |          |            | Cis FA or SFA |       |          |       |       |          |          |          |         |         |         |         |         |
|--|------------|--------------|----------|-----------|------------|----------------|----------|------------|---------------|-------|----------|-------|-------|----------|----------|----------|---------|---------|---------|---------|---------|
|  |            | 16:1n-7t     | 18:1n-7t | c9t11-CLA | t10c12-CLA | 18:1n-6t       | 18:1n-9t | 18:2n-6,9t | 15:0          | 16:0  | 16:1n-7c | 17:0  | 18:0  | 18:1n-9c | 18:1n-7c | 18:2n-6c | 20:3n-6 | 20:4n-6 | 20:5n-3 | 22:5n-3 | 22:6n-3 |
|  | 16:1n-7t   | 1            |          |           |            |                |          |            |               |       |          |       |       |          |          |          |         |         |         |         |         |
|  | 18:1n-7t   | 0.70         | 1        |           |            |                |          |            |               |       |          |       |       |          |          |          |         |         |         |         |         |
|  | c9t11-CLA  | 0.34         | 0.47     | 1         |            |                |          |            |               |       |          |       |       |          |          |          |         |         |         |         |         |
|  | t10c12-CLA | 0.49         | 0.39     | 0.12      | 1          |                |          |            |               |       |          |       |       |          |          |          |         |         |         |         |         |
|  | 18:1n-6t   | 0.61         | 0.66     | 0.16      | 0.54       | 1              |          |            |               |       |          |       |       |          |          |          |         |         |         |         |         |
|  | 18:1n-9t   | 0.39         | 0.50     | 0.05      | 0.34       | 0.75           | 1        |            |               |       |          |       |       |          |          |          |         |         |         |         |         |
|  | 18:2n-6,9t | 0.46         | 0.29     | -0.04     | 0.53       | 0.41           | 0.32     | 1          |               |       |          |       |       |          |          |          |         |         |         |         |         |
|  | 15:0       | 0.46         | 0.49     | 0.50      | 0.16       | 0.17           | -0.12    | 0.06       | 1             |       |          |       |       |          |          |          |         |         |         |         |         |
|  | 16:0       | 0.00         | -0.23    | 0.28      | -0.11      | -0.22          | -0.20    | -0.07      | 0.09          | 1     |          |       |       |          |          |          |         |         |         |         |         |
|  | 16:1n-7c   | -0.27        | -0.32    | 0.36      | -0.18      | -0.16          | -0.03    | -0.21      | -0.17         | 0.40  | 1        |       |       |          |          |          |         |         |         |         |         |
|  | 17:0       | 0.52         | 0.62     | 0.28      | 0.44       | 0.40           | 0.22     | 0.41       | 0.51          | -0.22 | -0.42    | 1     |       |          |          |          |         |         |         |         |         |
|  | 18:0       | -0.05        | 0.11     | -0.22     | 0.12       | 0.10           | 0.10     | 0.07       | -0.13         | -0.79 | -0.29    | 0.18  | 1     |          |          |          |         |         |         |         |         |
|  | 18:1n-9c   | -0.20        | -0.18    | 0.41      | -0.10      | -0.13          | 0.03     | -0.20      | -0.09         | 0.23  | 0.70     | -0.27 | -0.21 | 1        |          |          |         |         |         |         |         |
|  | 18:1n-7c   | -0.06        | -0.16    | 0.02      | -0.03      | -0.07          | 0.06     | 0.10       | -0.26         | 0.14  | 0.26     | -0.07 | -0.28 | 0.27     | 1        |          |         |         |         |         |         |
|  | 18:2n-6c   | 0.23         | 0.33     | -0.24     | 0.10       | 0.18           | 0.15     | 0.17       | 0.11          | -0.32 | -0.47    | 0.18  | 0.04  | -0.37    | -0.21    | 1        |         |         |         |         |         |
|  | 20:3n-6    | -0.16        | -0.21    | 0.12      | -0.10      | -0.10          | -0.11    | -0.23      | 0.03          | 0.16  | 0.26     | -0.17 | 0.02  | 0.07     | -0.14    | -0.31    | 1       |         |         |         |         |
|  | 20:4n-6    | -0.14        | -0.22    | -0.24     | -0.09      | -0.13          | -0.09    | -0.06      | -0.17         | -0.01 | -0.08    | -0.08 | 0.00  | -0.22    | 0.15     | -0.51    | 0.03    | 1       |         |         |         |
|  | 20:5n-3    | -0.05        | 0.03     | 0.16      | 0.00       | 0.04           | -0.05    | -0.04      | 0.06          | 0.02  | 0.02     | 0.07  | 0.06  | -0.06    | -0.09    | -0.44    | -0.12   | 0.05    | 1       |         |         |
|  | 22:5n-3    | -0.04        | 0.06     | 0.17      | 0.08       | 0.06           | 0.00     | -0.03      | 0.14          | -0.28 | 0.04     | 0.19  | 0.31  | 0.12     | -0.01    | -0.37    | -0.04   | 0.11    | 0.36    | 1       |         |
|  | 22:6n-3    | 0.10         | 0.02     | 0.04      | 0.07       | 0.10           | -0.09    | 0.08       | 0.08          | 0.02  | -0.14    | 0.15  | 0.04  | -0.27    | 0.04     | -0.39    | -0.15   | 0.07    | 0.56    | 0.29    | 1       |

**Supplementary Table 6. Factor loadings of the seven trans fatty acids on the retained principal component**

| TFA                         | Principal Component 1 (PC1)* |
|-----------------------------|------------------------------|
| 16:1n-7 <i>t</i>            | 0.83                         |
| 18:1n-7 <i>t</i>            | 0.83                         |
| <i>c</i> 9 <i>t</i> 11-CLA  | 0.38                         |
| <i>t</i> 10 <i>c</i> 12-CLA | 0.69                         |
| 18:1n-6 <i>t</i>            | 0.88                         |
| 18:1n-9 <i>t</i>            | 0.73                         |
| 18:2n-6,9 <i>t</i>          | 0.60                         |

\*53% explained total variance



**Supplementary Table 7. Prospective associations of TFA and T2D risk, with and without adjusting for alcohol intake and according to quartiles of alcohol intake**

| Fatty acid        | Hazard Ratio per 1-SD (95%CI)* by<br>Quartiles of Alcohol Intake |                                       |                                         |                                          | p-<br>interaction ‡ |
|-------------------|------------------------------------------------------------------|---------------------------------------|-----------------------------------------|------------------------------------------|---------------------|
|                   | First:<br>1.0 (0.5-1.9) †<br>(n=501)                             | Second:<br>5.2 (4.0-6.7) †<br>(n=472) | Third:<br>12.8 (10.0-16.1) †<br>(n=468) | Fourth:<br>33.9 (24.5-46.4) †<br>(n=486) |                     |
| <b>18:1n-7t</b>   | 0.44 (0.27-0.72)                                                 | 0.72 (0.47-1.10)                      | 0.62 (0.39-0.98)                        | 0.67 (0.45-0.99)                         | 0.05                |
| <b>c9t11-CLA</b>  | 1.70 (1.25-2.30)                                                 | 1.47 (1.09-1.99)                      | 1.20 (0.88-1.62)                        | 1.42 (1.08-1.87)                         | 0.74                |
| <b>t10c12-CLA</b> | 0.76 (0.55-1.04)                                                 | 0.75 (0.57-0.98)                      | 1.12 (0.80-1.57)                        | 0.78 (0.59-1.02)                         | 0.35                |

\* Hazard Ratios (HR) and 95% confidence intervals (95% CI) derived from a multivariable Cox regression model adjusted for age (stratum variable), sex, waist circumference, BMI, smoking status (never, past, current, <20 cigarettes/day, or current >20 cigarettes/day), cycling (0, 0.1–2.4, 2.5–4.9, or ≥5 h/week), sports activity (0, 0.1–4.0, or >4.0 h/week), occupational activity (light, moderate, or heavy), education (in or no training, skilled worker, technical school, or university degree), red meat intake (energy-adjusted), coffee intake (energy-adjusted), fiber intake (energy-adjusted), fasting status, total energy intake and all the other trans fatty acids (16:1n-7t, 18:1n-6t, 18:1n-7t, 18:1n-9t, 18:2n-6,9t, c9t11-CLA, t10c12-CLA)

† Values are median (interquartile range) of grams of alcohol intake per day

‡ Derived from tests for statistical interactions of trans fatty acids concentrations with quartiles of alcohol intake by including cross-product terms in the fully-adjusted models

**Supplementary Table 8. Prospective associations of plasma trans fatty acids with risk of type 2 diabetes in men (total n=904, cases n=462) and women (total n=1023, cases n=334) from EPIC-Potsdam**

| Fatty acid                       | Men              | Women            | p- interaction * |
|----------------------------------|------------------|------------------|------------------|
| <b>16:1n-7t</b>                  |                  |                  |                  |
| Median concentration (IQR) (%) † | 0.04 (0.03-0.04) | 0.04 (0.03-0.05) |                  |
| Hazard Ratio per 1 SD (95% CI) ‡ | 1.05 (0.80-1.38) | 1.32 (1.00-1.72) | 0.73             |
| <b>18:1n-7t</b>                  |                  |                  |                  |
| Median concentration (IQR) (%) † | 0.17 (0.14-0.22) | 0.20 (0.16-0.25) |                  |
| Hazard Ratio per 1 SD (95% CI) ‡ | 0.74 (0.56-0.99) | 0.55 (0.40-0.75) | 0.82             |
| <b>c9t11-CLA</b>                 |                  |                  |                  |
| Median concentration (IQR) (%) † | 0.25 (0.21-0.29) | 0.27 (0.23-0.32) |                  |
| Hazard Ratio per 1 SD (95% CI) ‡ | 1.39 (1.13-1.72) | 1.45 (1.18-1.79) | 0.80             |
| <b>t10c12-CLA</b>                |                  |                  |                  |
| Median concentration (IQR) (%) † | 0.01 (0.01-0.01) | 0.01 (0.01-0.01) |                  |
| Hazard Ratio per 1 SD (95% CI) ‡ | 1.03 (0.85-1.25) | 0.59 (0.46-0.74) | 0.06             |
| <b>18:1n-6t</b>                  |                  |                  |                  |
| Median concentration (IQR) (%) † | 0.09 (0.07-0.11) | 0.10 (0.08-0.12) |                  |
| Hazard Ratio per 1 SD (95% CI) ‡ | 0.91 (0.65-1.25) | 1.23 (0.87-1.74) | 0.59             |
| <b>18:1n-9t</b>                  |                  |                  |                  |
| Median concentration (IQR) (%) † | 0.16 (0.13-0.19) | 0.16 (0.13-0.21) |                  |
| Hazard Ratio per 1 SD (95% CI) ‡ | 1.08 (0.82-1.43) | 1.15 (0.87-1.52) | 0.15             |
| <b>18:2n-6,9t</b>                |                  |                  |                  |
| Median concentration (IQR) (%) † | 0.02 (0.02-0.03) | 0.02 (0.02-0.03) |                  |
| Hazard Ratio per 1 SD (95% CI) ‡ | 0.82 (0.67-1.00) | 1.13 (0.89-1.43) | 0.13             |

\* Derived from tests for statistical interactions of trans fatty acids concentrations with sex by including cross-product terms in the continuous fully-adjusted models

† Plasma TFA concentrations based on the subcohort sample (men n=454, women n=705)

‡ The standard deviation (SD) was derived from full cohort. Hazard ratio (HR) and 95% confidence interval (CI) per-1 SD increase of each trans fatty acid, after accounting for age (stratum variable), sex, waist circumference, BMI, smoking status (never, past, current, <20 cigarettes/day, or current >20 cigarettes/day), cycling (0, 0.1–2.4, 2.5–4.9, or ≥5 h/week), sports activity (0, 0.1–4.0, or >4.0 h/week), occupational activity (light, moderate, or heavy), education (in or no training, skilled worker, technical school, or university degree), alcohol intake (0, 0.1–5.0, 5.1–10.0, 10.1–20.0, 20.1–40.0, or >40.0 g/d), red meat intake (energy-adjusted), coffee intake (energy-adjusted), fiber intake (energy-adjusted), fasting status, total energy intake and all other TFA subtypes (16:1n-7t, 18:1n-6t, 18:1n-7t, 18:1n-9t, 18:2n-6,9t, c9t11-CLA, t10c12-CLA)

**Supplementary Table 9. Prospective associations of plasma trans fatty acids with risk of type 2 diabetes according to BMI (above and below the median) in EPIC-Potsdam**

| Fatty acid     | Hazard Ratio per 1-SD (95%CI) * |                    | p- interaction BMI † |
|----------------|---------------------------------|--------------------|----------------------|
|                | BMI ≤27 (n = 955)               | BMI > 27 (n = 972) |                      |
| Ruminant TFA   |                                 |                    |                      |
| 16:1n-7t       | 1.35 (0.98-1.86)                | 1.00 (0.79-1.27)   | 0.42                 |
| 18:1n-7t       | 0.57 (0.41-0.79)                | 0.76 (0.58-1.01)   | 0.47                 |
| c9t11-CLA      | 1.55 (1.21-2.00)                | 1.31 (1.07-1.59)   | 0.38                 |
| t10c12-CLA     | 0.76 (0.59-0.98)                | 0.81 (0.68-0.98)   | 0.90                 |
| Industrial TFA |                                 |                    |                      |
| 18:1n-6t       | 1.34 (0.90-2.01)                | 1.04 (0.76-1.43)   | 0.72                 |
| 18:1n-9t       | 0.80 (0.53-1.18)                | 1.06 (0.84-1.35)   | 0.56                 |
| 18:2n-6,9t     | 1.05 (0.76-1.45)                | 0.99 (0.83-1.19)   | 0.96                 |

\* Hazard ratio (HR) and 95% confidence interval (CI) per-1SD increase of each trans fatty acid in the EPIC-Potsdam subcohort (total n= 1927, cases n=796), after accounting for age (stratum variable), sex, waist circumference, BMI, smoking status (never, past, current, <20 cigarettes/day, or current >20 cigarettes/day), cycling (0, 0.1–2.4, 2.5–4.9, or ≥5 h/week), sports activity (0, 0.1–4.0, or >4.0 h/week), occupational activity (light, moderate, or heavy), education (in or no training, skilled worker, technical school, or university degree), alcohol intake (0, 0.1–5.0, 5.1–10.0, 10.1–20.0, 20.1–40.0, or >40.0 g/d), red meat intake (energy-adjusted), coffee intake (energy-adjusted), fiber intake (energy-adjusted), fasting status, total energy intake and all other TFA subtypes (16:1n-7t, 18:1n-6t, 18:1n-7t, 18:1n-9t, 18:2n-6,9t, c9t11-CLA, t10c12-CLA)

† Derived from tests for statistical interactions of trans fatty acids concentrations with BMI≤27 and BMI>27 by including cross-product terms in the continuous fully-adjusted models

**Supplementary Table 10. Prospective associations of plasma trans fatty acids with risk of type 2 diabetes according to polymorphisms in the *PPARG* gene, in EPIC-Potsdam**

| Fatty acid        | Hazard Ratio per 1-SD (95%CI) *                    |                                                      |                 |
|-------------------|----------------------------------------------------|------------------------------------------------------|-----------------|
|                   | <i>PPARG</i> Pro12Pro<br>(Wild type)<br>(n = 1362) | <i>PPARG</i> Pro12Ala<br>(Ala carriers)<br>(n = 485) | p-interaction † |
| <b>c9t11-CLA</b>  | 1.37 (1.13-1.65)                                   | 1.48 (1.12-1.96)                                     | 0.92            |
| <b>t10c12-CLA</b> | 0.78 (0.66-0.92)                                   | 0.82 (0.59-1.14)                                     | 0.50            |

\* Hazard ratio (HR) and 95% confidence interval (CI) per-1SD increase of each trans fatty acid in the EPIC-Potsdam subcohort (total n= 1927, cases n=796), after accounting for age (stratum variable), sex, waist circumference, BMI, smoking status (never, past, current, <20 cigarettes/day, or current >20 cigarettes/day), cycling (0, 0.1–2.4, 2.5–4.9, or ≥5 h/week), sports activity (0, 0.1–4.0, or >4.0 h/week), occupational activity (light, moderate, or heavy), education (in or no training, skilled worker, technical school, or university degree), alcohol intake (0, 0.1–5.0, 5.1–10.0, 10.1–20.0, 20.1–40.0, or >40.0 g/d), red meat intake (energy-adjusted), coffee intake (energy-adjusted), fiber intake (energy-adjusted), fasting status, total energy intake and other TFA subtypes (16:1n-7t, 18:1n-6t, 18:1n-7t, 18:1n-9t, 18:2n-6,9t, c9t11-CLA, t10c12-CLA)

† Derived from tests for statistical interactions of conjugated linoleic acid concentrations with *PPARG* polymorphisms (wild type vs ala carriers) by including cross-product dichotomous terms in the continuous fully-adjusted models

**Supplementary Table 11. Mediation analysis of associations of trans fatty acids with type 2 diabetes by metabolic markers and liver fat in EPIC-Potsdam (total n= 1927, cases n=796)**

|                          | <b>18:1n-7t</b>                |                     |  | <b>c9t11-CLA</b>               |                     |  | <b>t10c12-CLA</b>              |                     |  |
|--------------------------|--------------------------------|---------------------|--|--------------------------------|---------------------|--|--------------------------------|---------------------|--|
|                          | Hazard ratio per 1 SD (95%-CI) | % change (95%-CI) * |  | Hazard ratio per 1 SD (95%-CI) | % change (95%-CI) * |  | Hazard ratio per 1 SD (95%-CI) | % change (95%-CI) * |  |
| <b>Reference Model †</b> | <b>0.61 (0.47-0.79)</b>        | <b>-</b>            |  | <b>1.53 (1.29; 1.87)</b>       | <b>-</b>            |  | <b>0.78 (0.60-0.98)</b>        | <b>-</b>            |  |
| + Triglycerides          | 0.60 (0.45-0.79)               | 5 (-16; 24)         |  | 1.40 (1.15-1.73)               | -20 (-47; -5)       |  | 0.85 (0.63; 1.10)              | -35 (-189; -6)      |  |
| + Non-HDL cholesterol    | 0.61 (0.47-0.81)               | -0.8 (-9; 4)        |  | -                              | -                   |  | 0.79 (0.6; 1.01)               | -7 (-77; 19)        |  |
| + HDL-cholesterol        | -                              | -                   |  | -                              | -                   |  | 0.78 (0.58; 1.00)              | 1 (-45; 30)         |  |
| + HbA <sub>1c</sub>      | 0.54 (0.37-0.75)               | 27 (-24; 116)       |  | 1.42 (1.12-1.88)               | -16 (-65; 28)       |  | -                              | -                   |  |
| + GGT                    | 0.57 (0.43-0.75)               | 16 (-13; 49)        |  | -                              | -                   |  | 0.81 (0.61; 1.04)              | -12 (-107; 21)      |  |
| + Adiponectin            | 0.59 (0.45-0.79)               | 6 (-9; 24)          |  | -                              | -                   |  | -                              | -                   |  |
| + hsCRP                  | 0.53 (0.39-0.74)               | 29 (1; 68)          |  | -                              | -                   |  | 0.78 (0.59; 0.98)              | 0 (-38; 53)         |  |
| + Fetuin                 | -                              | -                   |  | -                              | -                   |  | -                              | -                   |  |
| + FLI ‡                  | 0.60 (0.45; 0.78)              | 6 (-23; 39)         |  | 1.37 (1.12-1.71)               | -26 (-58; -6)       |  | 0.86 (0.64; 1.10)              | -38 (-205; -6)      |  |

\* The change (%) reflects the change of the estimate after additional adjustment for each biomarkers and fatty liver index, relative to the estimate from the reference model. Its stability as well as the corresponding hazard ratio were estimated as median and dispersion from a bootstrapping procedure (500 bootstrap replicates)

† Hazard ratio (HR) and 95% confidence interval (CI) per-1SD increase of each trans fatty acid, estimated as median and dispersion from a bootstrapping procedure (500 bootstrap replicates). Models adjusted for age (stratum variable), sex, waist circumference, BMI, smoking status (never, past, current, <20 cigarettes/day, or current >20 cigarettes/day), cycling (0, 0.1–2.4, 2.5–4.9, or ≥5 h/week), sports activity (0, 0.1–4.0, or >4.0 h/week), occupational activity (light, moderate, or heavy), education (in or no training, skilled worker, technical school, or university degree), alcohol intake (0, 0.1–5.0, 5.1–10.0, 10.1–20.0, 20.1–40.0, or >40.0 g/d), red meat intake (energy-adjusted), coffee intake (energy-adjusted), fiber intake (energy-adjusted), fasting status, total energy intake, all other TFA subtypes (16:1n-7t, 18:1n-6t, 18:1n-7t, 18:1n-9t, 18:2n-6,9t, c9t11-CLA, t10c12-CLA)

‡ Fatty liver index (FLI) was calculated with the following formula:  $FLI = (e^{0.953 \cdot \log_e(\text{triglycerides}) + 0.139 \cdot \text{BMI} + 0.718 \cdot \log_e(\text{ggt}) + 0.053 \cdot \text{waist circumference} - 15.745}) / (1 + e^{0.953 \cdot \log_e(\text{triglycerides}) + 0.139 \cdot \text{BMI} + 0.718 \cdot \log_e(\text{ggt}) + 0.053 \cdot \text{waist circumference} - 15.745}) * 100$

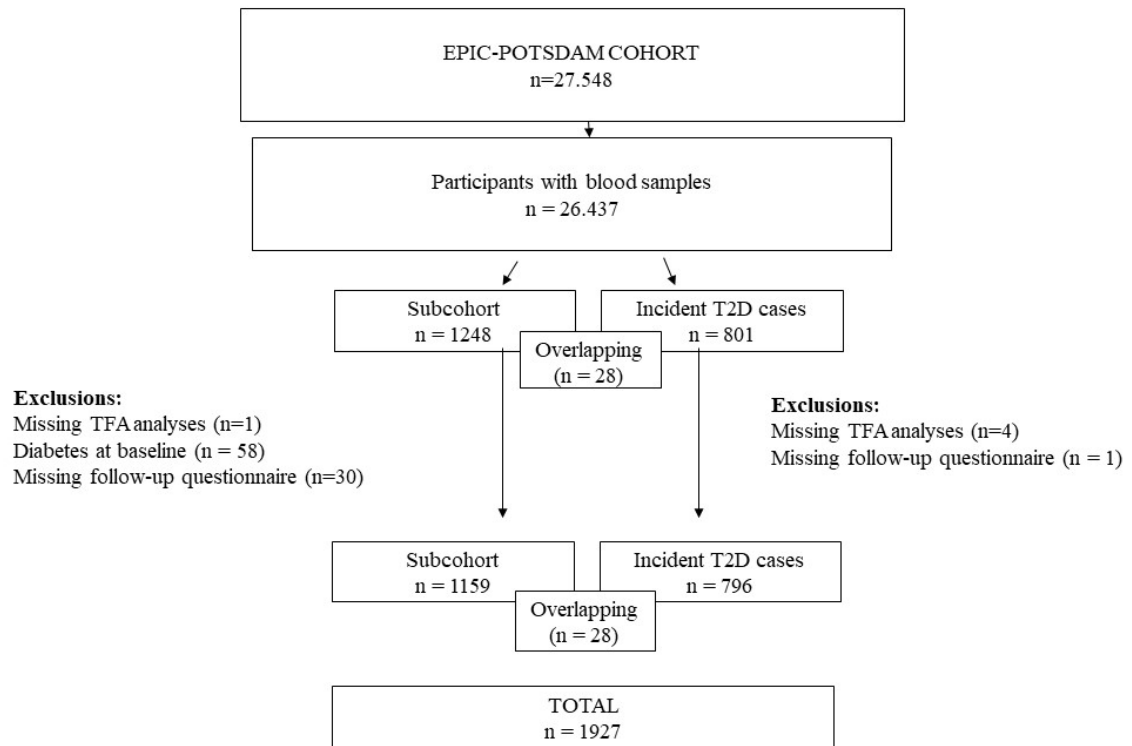

**Supplementary Figure 1. Flow chart describing study sample**

T2D: type 2 diabetes

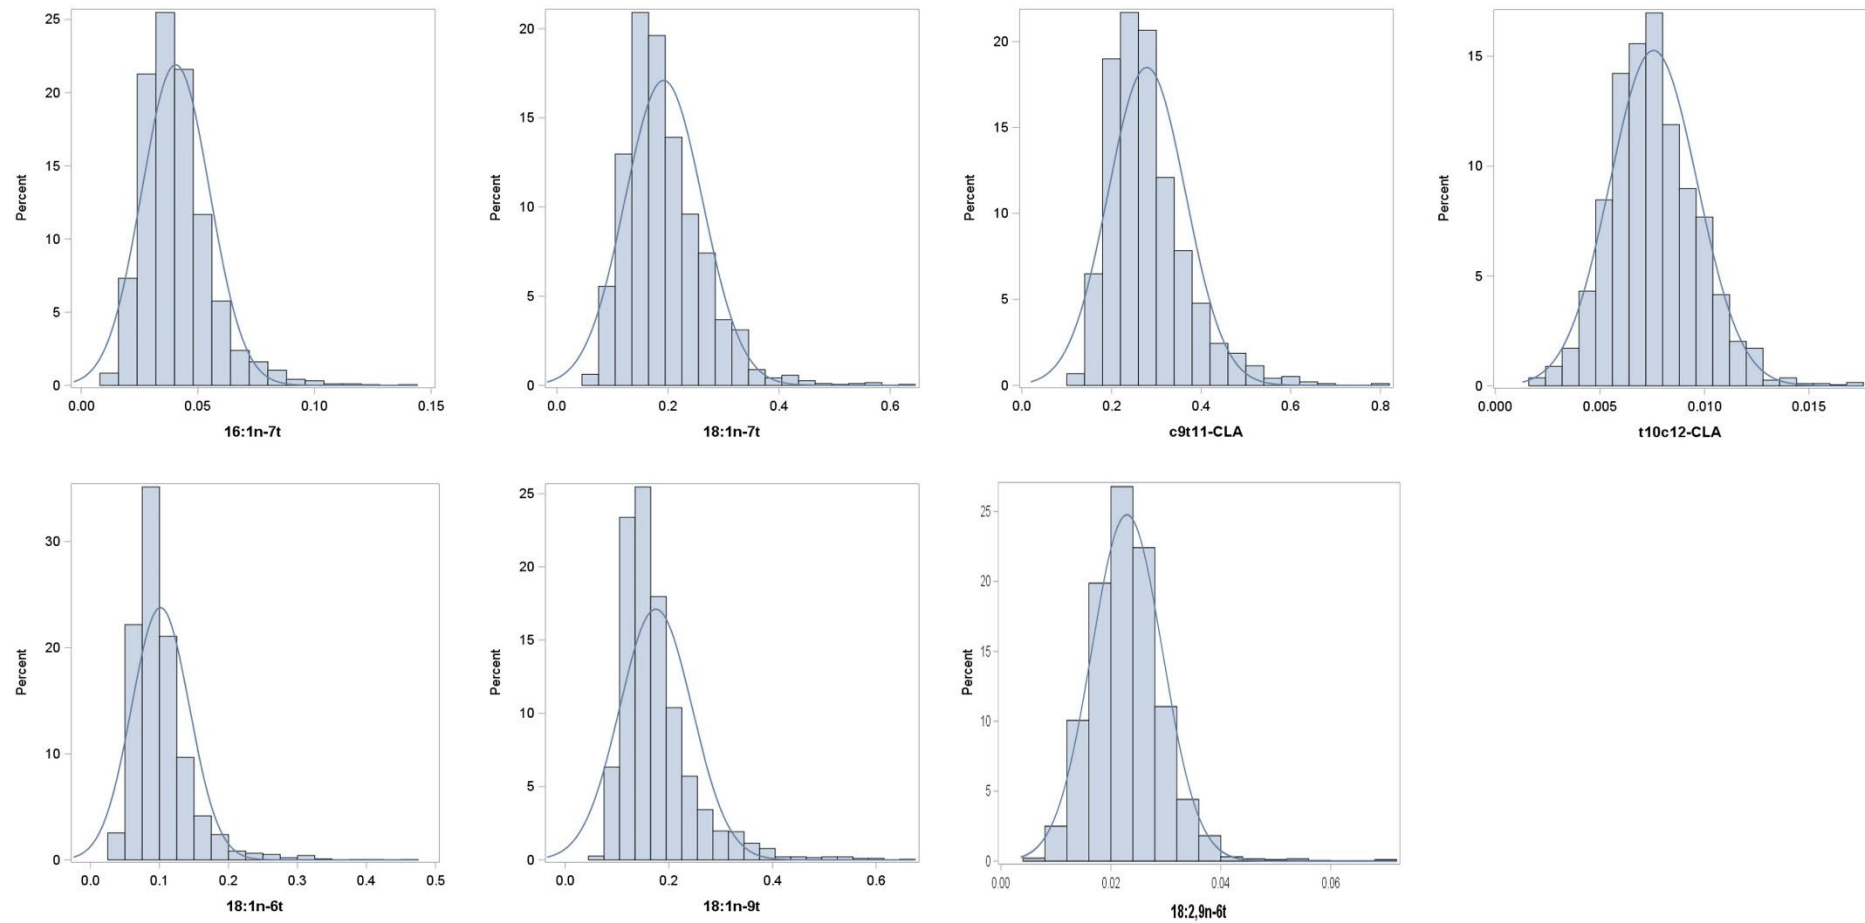

**Supplementary Figure 2. Trans fatty acids histograms**

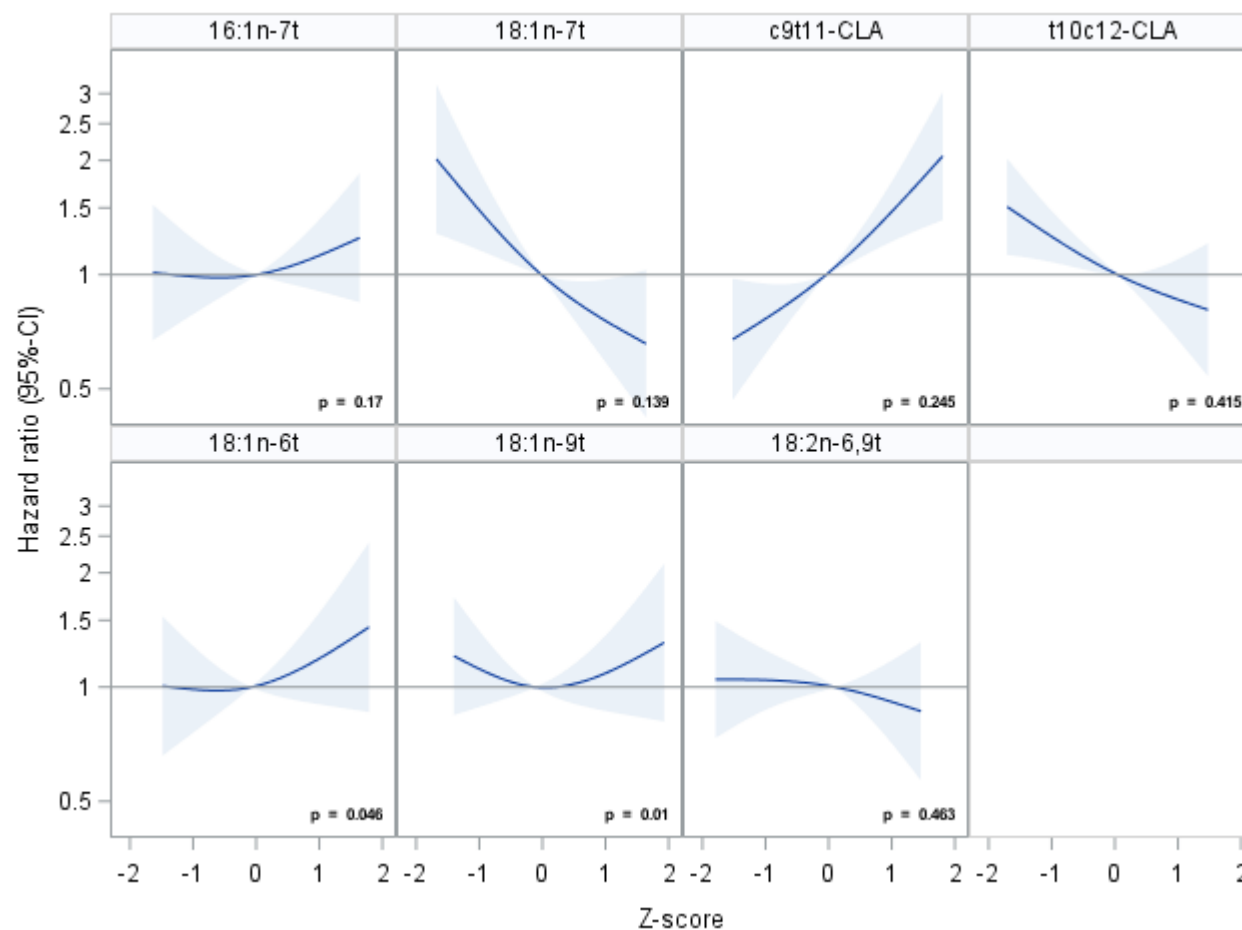

**Supplementary Figure 3. Prospective associations between trans fatty acids and incidence of T2D modelled using a restricted cubic spline function with 3 knots placed at the 10<sup>th</sup>, 50<sup>th</sup> and 90<sup>th</sup> percentiles in the EPIC Potsdam (total n= 1927, cases n=796). Shaded areas are 95% confidence intervals. Numbers in the bottom right of each panel are p-values based on the likelihood ratio test**



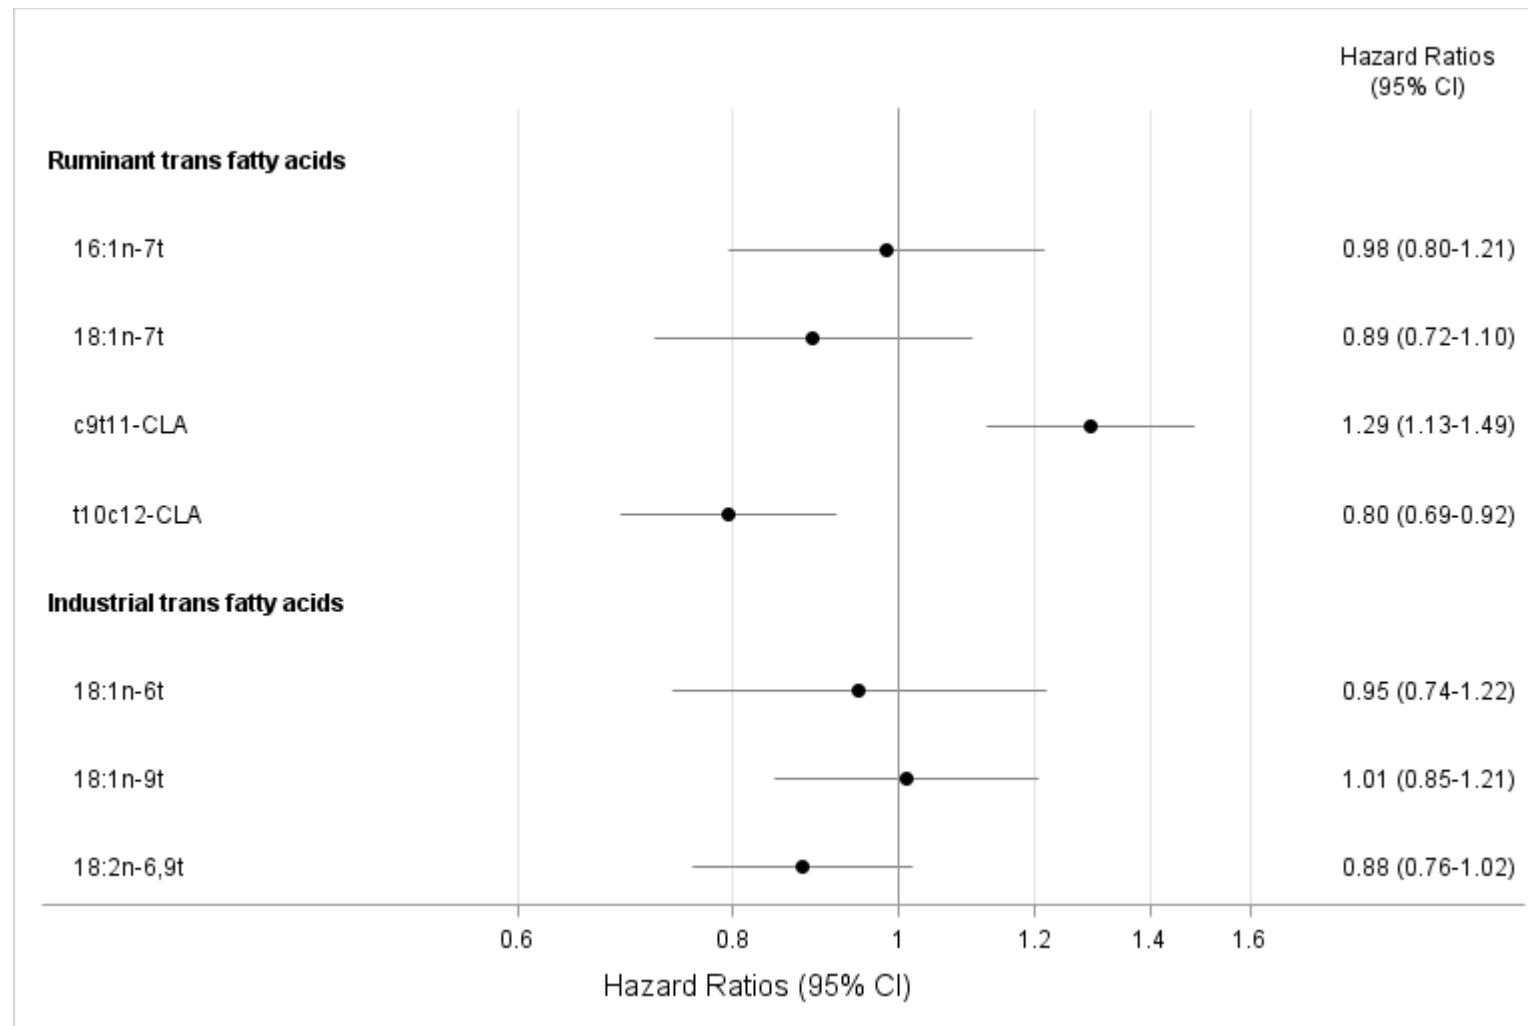

**Supplementary Figure 4. Prospective associations of plasma trans fatty acids with risk of type 2 diabetes in EPIC-Potsdam (total n= 1927, cases n=796), with a model further adjusted for PC score. Hazard ratio (HR) and 95% confidence interval (CI) per-1SD increase of each trans fatty acid**

Model adjusted for age (stratum variable), sex, waist circumference, BMI, smoking status (never, past, current, <20 cigarettes/day, or current >20 cigarettes/day), cycling (0, 0.1–2.4, 2.5–4.9, or ≥5 h/week), sports activity (0, 0.1–4.0, or >4.0 h/week), occupational activity (light, moderate, or heavy), education (in or no training, skilled worker, technical school, or university degree), alcohol intake (0, 0.1–5.0, 5.1–10.0, 10.1–20.0, 20.1–40.0, or >40.0 g/d), red meat intake (energy-adjusted), coffee intake (energy-adjusted), fiber intake (energy-adjusted), fasting status, total energy intake and PC score

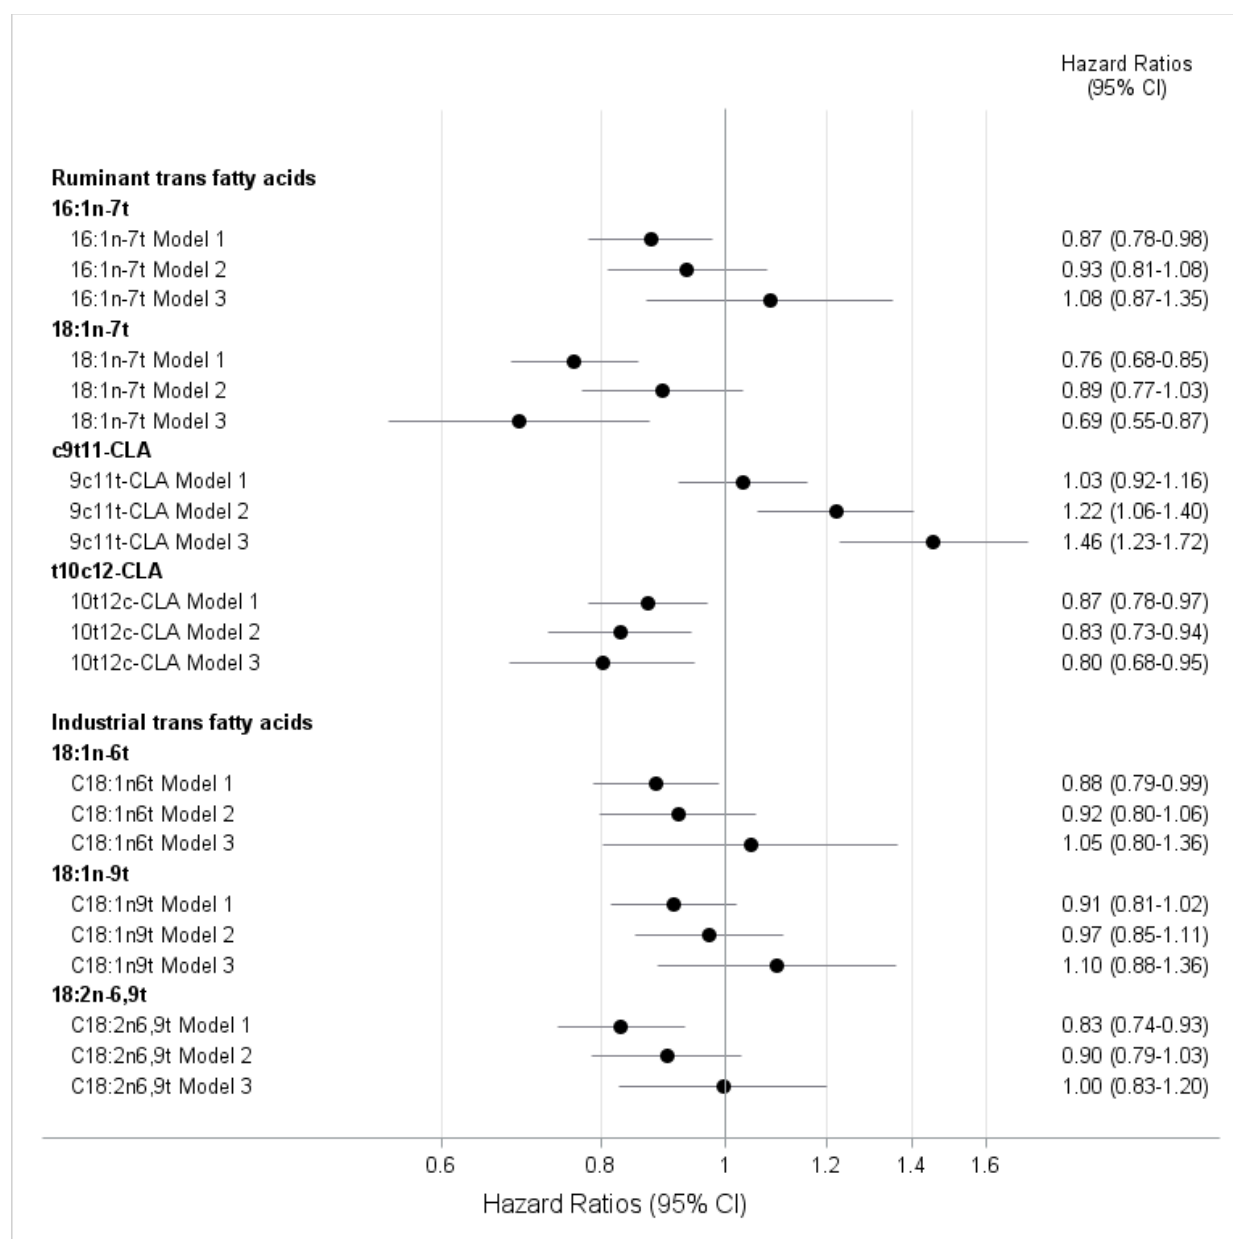

**Supplementary Figure 5. Sensitivity Analysis, excluding participants with HbA1c>6.5 (Total n=1651, cases n=564)**

Model 1: adjusted for age (stratum variable) and sex

Model 2: further adjusted for waist circumference, BMI, smoking status (never, past, current, <20 cigarettes/day, or current >20 cigarettes/day), cycling (0, 0.1–2.4, 2.5–4.9, or ≥5 h/week), sports activity (0, 0.1–4.0, or >4.0 h/week), occupational activity (light, moderate, or heavy), education (in or no training, skilled worker, technical school, or university degree), alcohol intake (0, 0.1–5.0, 5.1–10.0, 10.1–20.0, 20.1–40.0, or >40.0 g/d), red meat intake (energy-adjusted), coffee intake (energy-adjusted), fiber intake (energy-adjusted), fasting status, total energy intake

Model 3: further adjusted for all other TFA subtypes (16:1n-7t, 18:1n-6t, 18:1n-7t, 18:1n-9t, 18:2n-6,9t, c9t11-CLA, t10c12-CLA)

## Fatty Acid Measurements

In detail, 50  $\mu$ L of plasma was transferred into 16 x 100 mm teflon coated screw capped vials. After addition of 1 mL deionized water total lipids were extracted with 3 mL *tert*-butyl methyl ether (MTBE)/methanol solution (2/1, v/v) (MTBE containing 0.01% butyl hydroxytoluene (BHT)). The mixture was vortexed for 15 min. After centrifugation, the upper layer containing the lipid fractions was transferred into another vial to evaporate to dryness under a stream of N<sub>2</sub> at 40°C.

For SPE the dried lipids were redissolved into 500  $\mu$ L chloroform. The mixture was applied to conditioned SPE columns (1 mL) containing 100 mg of aminopropyl-modified silica. The columns are placed on a vacuum elution apparatus equipped with vents and manometer. Conditioning of columns was performed by washing with 2 x 1 mL *n*-hexane and 1 x 1 mL chloroform/*i*-propanol (2/1, v/v). The vacuum (~10 kPa) was released in time to prevent columns from becoming completely dry. Firstly, neutral lipids and free FA were eluted with 4 x 1 mL chloroform/methanol/acetic acid (100/2/2, v/v). After changing vials the PL were eluted with 2 x 1 mL methanol. Solvents were evaporated under a stream of N<sub>2</sub> at 40°C.

For hydrolysis and methylation of FA the dried PL were redissolved into 230  $\mu$ L toluene and transferred into GC-vials. 20  $\mu$ L of trimethyl sulfonium hydroxide solution (TMSH, 0.25 mol/L in methanol, were added to form FA methyl esters (FAME) from FA of PL (except of sphingolipids). Vials were vortexed (30 min, 750 min<sup>-1</sup>, 40°C). Samples containing the FAMEs were analyzed by GC.

Analysis of FAMEs was performed using an Agilent GC system 7890A equipped with Agilent 7000 GC/MS Triple Quad (Agilent Technologies, Waldbronn, Germany) and a FID. 1  $\mu$ L of sample was injected using a CIS 4C PTV-type GC-inlet (Gerstel) in splitless mode at 30°C, 30-260°C, ramp 12°C/s, held 2 min, 260-320°C, ramp 12°C/s.

The FAMEs were separated on a GC capillary column (HP-88, 100 m x 0.25 mm I.D., 0.2  $\mu$ m film thickness, Agilent) using a constant He carrier gas flow of 1.3 mL/min. The eluting gas flow was splitted for FID and MS detection (1:1) using a 2-way splitter.

FID conditions were as follows: heater at 250°C, H<sub>2</sub> flow at 40 mL/min, air flow at 400 mL/min, and makeup flow at 30 mL/min. GC-MS/MS conditions were as follows: EI ion source at 230°C, He quench gas at 2.25 mL/min, and N<sub>2</sub> collision gas at 1.5 mL/min.

The following FAME standards of odd chain fatty acids (OCFA) and trans fatty acids (TFA) were used for calibration: 15:0 and 17:0 (Sigma-Aldrich, Taufkirchen, Germany), 16:1n-7*t*, 18:1n-9*t*, 18:1n-7*t*, 18:1n-6*t*, 18:2n-6*t*, *c*9*t*11-CLA, and *t*10*c*12-CLA (NuChek-Prep, Elysian, USA). The MRM counts were related to corresponding FID counts using calibration standards resulting in individual linear regression curves and conversion factors. The MRM counts of OCFA and TFA of each sample were transformed into FID analogous counts using corresponding conversion factors of each FA. The results were expressed in area percentage of each FA relative to total area of all 9 FA. Simultaneously, a basic FA spectrum of 13 FA can be evaluated by FID detection and expressed in area percentage of each FA relative to total area of all 13 FA. The spectrum consists of the following FA: 15:0, 16:0, 16:1n-7*c*, 17:0, 18:0, 18:1n-9*c*, 18:1n-7*c*, 18:2n-6*c*, 20:3n-6, 20:4n-6, 20:5n-3, 22:5n-3, 22:6n-3.

We did not use lower limits of detection (LOD) because we worked with area sum%. Instead, we used a signal-to-noise ratio better than 3 (S/N=3) for all analytes. This means that all peaks that were at least three times larger than the noise were evaluated. This was true for all fatty acids indicated.

The reproducibility of the analytes was determined by a comparison of intra- and interassay coefficients of variation (CV%, *n*=10) of the OCFA and TFA detected by MRM (two extractions injected twice) calculated according to Rodbard (1974) were as follows (see table):

| <b>Fatty acid</b>           | <b>Systematic name</b>       | <b>Mean <math>\pm</math> SD<br/>(area sum%)</b> | <b>Intra-assay CV<br/>(%)</b> | <b>Inter-assay CV<br/>(%)</b> |
|-----------------------------|------------------------------|-------------------------------------------------|-------------------------------|-------------------------------|
| 15:0                        | pentadecanoic acid           | 17.10 $\pm$ 3.18                                | 1.57                          | 1.97                          |
| 16:1n-7 <i>t</i>            | 9E-hexadecenoic acid         | 3.04 $\pm$ 0.44                                 | 1.67                          | 3.65                          |
| 17:0                        | heptadecanoic acid           | 26.90 $\pm$ 2.87                                | 0.69                          | 0.90                          |
| 18:1n-9 <i>t</i>            | trans-9-octadecenoic acid    | 16.89 $\pm$ 3.99                                | 2.00                          | 2.71                          |
| 18:1n-7 <i>t</i>            | trans-11-octadecenoic acid   | 15.94 $\pm$ 1.93                                | 1.08                          | 1.11                          |
| 18:1n-6 <i>t</i>            | trans-12-octadecenoic acid   | 6.45 $\pm$ 1.86                                 | 1.21                          | 1.98                          |
| 18:2n-6,9 <i>t</i>          | 9E,12E-octadecadienoic acid  | 0.55 $\pm$ 0.12                                 | 4.17                          | 2.50                          |
| <i>c</i> 9 <i>t</i> 11-CLA  | 9Z,11E-octadecadienoic acid  | 12.90 $\pm$ 5.91                                | 1.59                          | 1.96                          |
| <i>t</i> 10 <i>c</i> 12-CLA | 10E,12Z-octadecadienoic acid | 0.23 $\pm$ 0.06                                 | 9.51                          | 4.66                          |

## Reference:

Rodbard D (1974) Statistical quality control and routine data processing for radioimmunoassays and immunoradiometric assays. Clinical chemistry 20 (10):1255-1270
